# Supplementary material for: One hundred fold increase in current carrying capacity in a carbon nanotube–copper composite
Source: PubMed Central journal article supplement — Nat Commun. 2013 Jul 23;4:2202. doi: 10.1038/ncomms3202 (PMC3759037; doi:10.1038/ncomms3202), 2013-07-23
Supplement: ncomms3202-s1.pdf [file ncomms3202-s1.pdf]

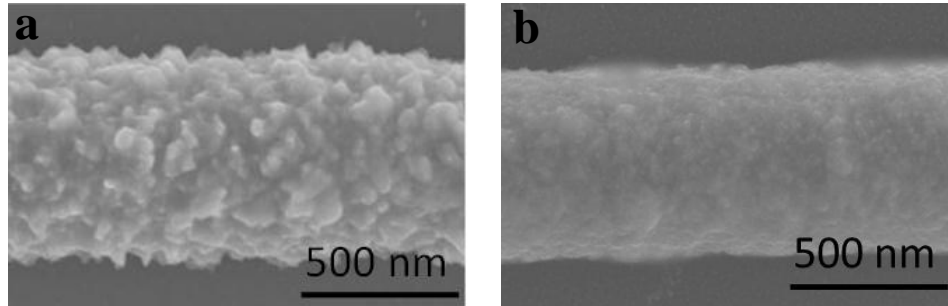

**Supplementary Figure S1. Recrystallization of CNT-Cu composite during Ampacity measurement.** Scanning electron microscopy images of CNT-Cu composite **a**, before and **b**, during the ampacity test. **b**, was recorded after subjecting the test structure to a current density of  $6 \times 10^6 \text{ Acm}^{-2}$  (where pure Cu fails). The morphology shows a clear smoothing and recrystallization. The resistivity changes from  $23.8 \times 10^{-6} \text{ }\Omega\cdot\text{cm}$  to  $4.3 \times 10^{-6} \text{ }\Omega\cdot\text{cm}$ .

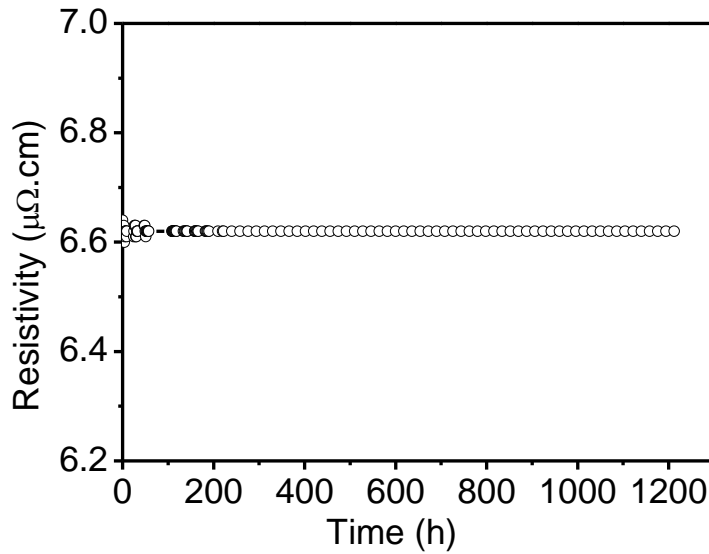

**Supplementary Figure S2. Lifetime testing of CNT-Cu composite.** Variation of resistivity of CNT-Cu composite with time under a constant DC current stress of  $1 \times 10^8 \text{ Acm}^{-2}$ . An invariant resistivity for over 1200 hours of testing indicates a very stable material.

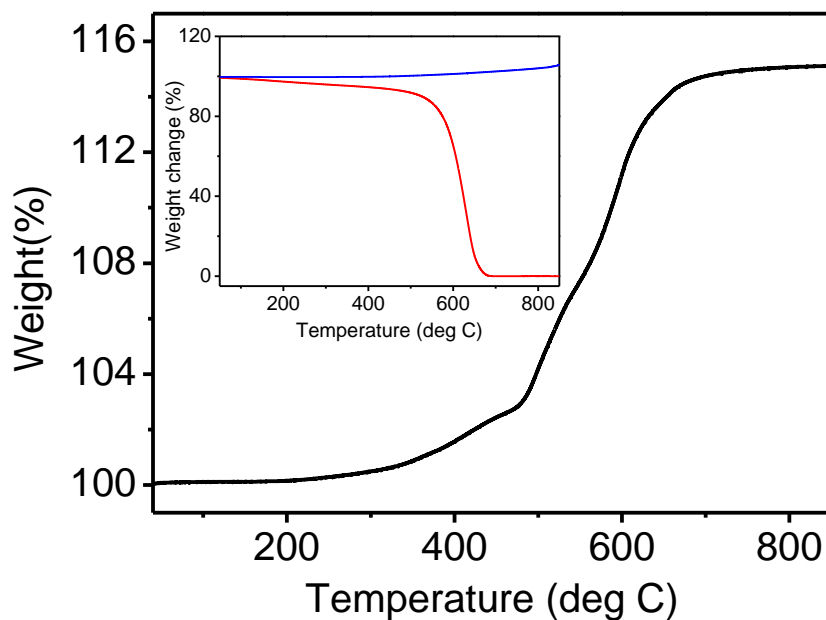

**Supplementary Figure S3. Thermogravimetric (TG) measurements and analysis of CNT-Cu composite.** Thermogravimetric data of CNT-Cu composite recorded in oxygen-rich ambience. Inset, similar data for pure CNT (red trace) and pure Cu (blue trace) are given for comparison. CNT-Cu composite shows an weight gain due to oxidation of copper. Assuming a complete burn-out of CNT and a complete oxidation of Cu, the following equation is formed:  $2Cu + C_{CNT} + 2O_2 = 2CuO + C_{CNT}O_2$ . The weight fraction of Cu and CNT were estimated based on this equation. The corresponding volume fractions is estimated from their densities ( $Cu = 8.9 \text{ gcm}^{-3}$ ,  $CNT \text{ solid} = 0.5 \text{ gcm}^{-3}$ ). The complete burn-out of CNT during TGA is supported by the fact that we did not find any residual carbon in energy-dispersive X-ray (EDX) analysis of the sample after TG, as shown in Supplementary Figure S4.

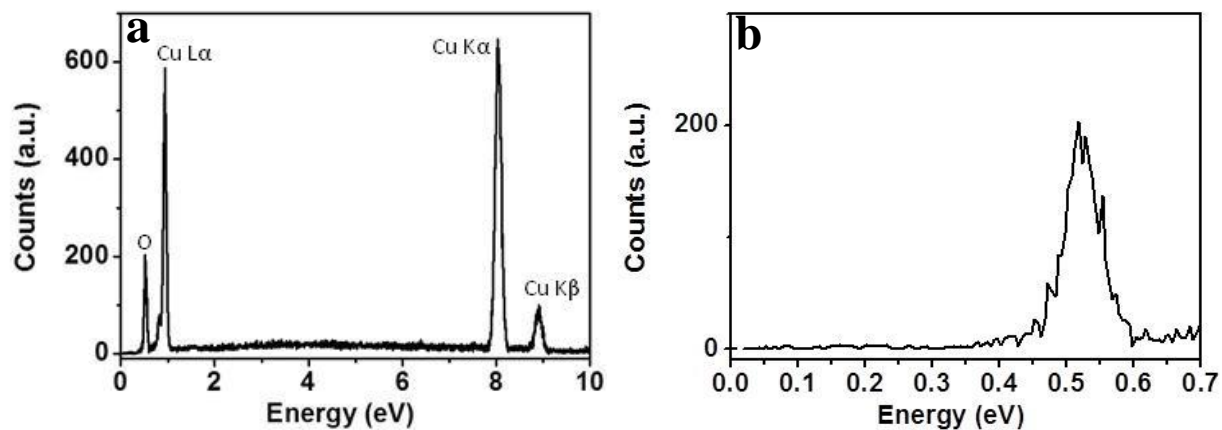

**Supplementary Figure S4. EDX data.** a, Energy dispersive X-ray analysis of the CNT-Cu composite sample after TGA. Prominent Cu and O peaks are observed indicating complete oxidation of Cu during TGA. b, Absence of carbon peak indicated complete burn-out of the CNT during TGA, validating our assumption.
